# Supplementary material
Source: PubMed Central journal article supplement (PMC2680102)
Supplement: supp_122_10_1626__5.pdf [file supp_122_10_1626__5.pdf]

1 ctggaacagcaagtgggtggatttggagaagagaaccaaaaacttctgttagaaaatcag 60  
L E Q Q V V D L E E E N Q K L L L E N Q  
61 cttttgagagagaaaactcatggccttgtaattgagaaccaggagttaagaactcgcttg 120  
L L R E K T H G L V I E N Q E L R T R L  
121 ggaatggatgtgctgactactgaagaggctccagagacggagtccaagggaaatggagta 180  
G M D V L T T E E A P E T E S K G N G V  
181 aggccggtggccgggtctgctgagtccgcagca**ctcagactacgtgcacctctgcagcag** 240  
R P V A G S A E S A A L R L R A P L Q Q  
241 gtgcaggcccagttgtcacctccccagaacatcttcccatggattctgacactgttgact 300  
V Q A Q L S P P Q N I F P W I L T L L T  
301 cttcagactccgagtctgatatccttttgggcattctggacaagttggaccctgtcatgt 360  
L Q T P S L I S F W A F W T S W T L S C  
361 ttttcaaatgtccatccccagagtctgccaatctggaggaactcccagaggtctacccag 420  
F S N V H P Q S L P I W R N S Q R S T Q  
421 gacctagttccttaccagcctccctttctctgtcagtggggacctcatcagccaagctgg 480  
D L V P Y Q P P F L C Q W G P H Q P S W  
481 aagccattaatgaactcattcgctttgaccatgtatacaccaagcctctag 532  
K P L M N S F A L T M Y T P S L **STOP**
