# Supplementary material
Source: PubMed Central journal article supplement (PMC2680102)
Supplement: supp_122_10_1626__7.pdf [file supp_122_10_1626__7.pdf]

**Table S1. Comparison of lipid metabolism genes regulated by enforced expression of ATF6 $\alpha$ (1-373) and XBP1(S) in NIH-3T3 fibroblasts**

| Gene symbol    | Gene title                                                                                   | ATF6 $\alpha$ (1-373)<br>versus empty fold<br>change | XBP1(S) versus<br>empty fold change |
|----------------|----------------------------------------------------------------------------------------------|------------------------------------------------------|-------------------------------------|
| <i>Chka</i>    | choline kinase alpha                                                                         | 16.88                                                | 1.03                                |
| <i>Chkb</i>    | choline kinase beta                                                                          | 4.63                                                 | 1.10                                |
| <i>Lpin1</i>   | lipin 1                                                                                      | 4.58                                                 | 3.46                                |
| <i>Fasn</i>    | fatty acid synthase                                                                          | 3.92                                                 | 1.02                                |
| <i>Lpin3</i>   | lipin 3                                                                                      | 3.73                                                 | 8.34                                |
| <i>Cyb5r1</i>  | cytochrome b5 reductase 1                                                                    | 2.78                                                 | 0.98                                |
| <i>Crot</i>    | carnitine O-octanoyltransferase                                                              | 2.03                                                 | -1.31                               |
| <i>Acsl3</i>   | acyl-CoA synthetase long-chain family member 3                                               | 2.02                                                 | 1.65                                |
| <i>Cyb5</i>    | cytochrome b-5                                                                               | 1.79                                                 | 3.45                                |
| <i>Agpat6</i>  | 1-acylglycerol-3-phosphate O-acyltransferase 6 (lysophosphatidic acid acyltransferase, zeta) | 1.63                                                 | 2.11                                |
| <i>Ppap2b</i>  | phosphatidic acid phosphatase type 2B                                                        | 1.50                                                 | -2.40                               |
| <i>Elovl4</i>  | elongation of very long chain fatty acids (FEN1/Elo2, SUR4/Elo3, yeast)-like 4               | 1.45                                                 | -2.40                               |
| <i>Pecr</i>    | peroxisomal trans-2-enoyl-CoA reductase                                                      | -1.72                                                | 4.47                                |
| <i>Acat1</i>   | acetyl-CoA acetyltransferase 1                                                               | -2.04                                                | -1.08                               |
| <i>Hadh2</i>   | hydroxyacyl-Coenzyme A dehydrogenase type II                                                 | -2.07                                                | -1.33                               |
| <i>Elovl5</i>  | ELOVL family member 5, elongation of long chain fatty acids (yeast)                          | -2.28                                                | -1.44                               |
| <i>Acsl4</i>   | acyl-CoA synthetase long-chain family member 4                                               | -2.34                                                | -1.05                               |
| <i>Hadhsc</i>  | L-3-hydroxyacyl-Coenzyme A dehydrogenase, short chain                                        | -2.62                                                | 1.00                                |
| <i>Fads1</i>   | fatty acid desaturase 1                                                                      | -2.64                                                | 1.07                                |
| <i>Sgms1</i>   | Sphingomyelin synthase 1                                                                     | -2.85                                                | 1.15                                |
| <i>Ppap2c</i>  | phosphatidic acid phosphatase type 2c                                                        | -2.95                                                | -2.06                               |
| <i>Acsl5</i>   | acyl-CoA synthetase long-chain family member 5                                               | -3.14                                                | -1.14                               |
| <i>Slc44a1</i> | Choline transporter-like protein 1                                                           | -3.19                                                | -2.22                               |
| <i>Elovl6</i>  | ELOVL family member 6, elongation of long chain fatty acids (yeast)                          | -3.47                                                | 1.60                                |
| <i>Nsmaf</i>   | Neutral sphingomyeliase activation associated factor                                         | -3.48                                                | -1.25                               |

Affymetrix microarray analysis revealed that a subset of genes encoding proteins that function in lipid metabolism were upregulated in ATF6 $\alpha$ (1-373)-transduced NIH-3T3 fibroblasts ( $\geq 2$ -fold as compared with empty vector controls;  $P < 0.05$ ).
