# Supplementary material
Source: PubMed Central journal article supplement (PMC2680102)
Supplement: supp_122_10_1626__8.pdf [file supp_122_10_1626__8.pdf]

**Table S2. Comparison of secretory pathway genes regulated by enforced expression of ATF6 $\alpha$ (1-373) and XBP1(S) in NIH-3T3 fibroblasts**

| Targeting and translocation |                       |         | Protein folding          |                       |         |
|-----------------------------|-----------------------|---------|--------------------------|-----------------------|---------|
| Gene symbol                 | ATF6 $\alpha$ (1-373) | XBP1(S) | Gene symbol              | ATF6 $\alpha$ (1-373) | XBP1(S) |
| Signal recognition particle |                       |         | Chaperones               |                       |         |
| <i>Srp9</i>                 |                       | ↑       | <i>Dnajb9</i>            | ↑                     | ↑       |
| <i>Srp19</i>                |                       | ↑       | <i>Dnajb10</i>           |                       | ↑       |
| <i>Sp54</i>                 |                       | ↑       | <i>Dnajb11</i>           | ↑                     | ↑       |
| <i>Srp68</i>                |                       | ↑       | <i>Dnajc1</i>            |                       | ↑       |
| <i>Srpr</i>                 |                       | ↑       | <i>Dnajc10</i>           | ↑                     | ↑       |
| <i>Srprb</i>                |                       | ↑       | <i>Fkbp1b</i>            |                       | ↑       |
|                             |                       |         | <i>Fkbp2</i>             | ↑                     | ↑       |
| Signal sequence receptor    |                       |         | <i>Fkbp7</i>             | ↑                     | ↑       |
| <i>Ssr1</i>                 |                       | ↑       | <i>Fkbp10</i>            |                       | ↑       |
| <i>Ssr2</i>                 |                       | ↑       | <i>Fkbp11</i>            | ↑                     | ↑       |
| <i>Ssr3</i>                 | ↑                     | ↑       | <i>Fkbp14</i>            | ↑                     | ↑       |
| <i>Ssr4</i>                 |                       | ↑       | <i>Hspa5</i>             | ↑                     | ↑       |
|                             |                       |         | <i>Hsp90bl</i>           | ↑                     | ↑       |
| Translocon                  |                       |         | <i>Hyoul</i>             | ↑                     | ↑       |
| <i>Sec61a1</i>              |                       | ↑       | <i>Ppib</i>              | ↑                     | ↑       |
| <i>Sec61b</i>               |                       | ↑       | <i>Stch</i>              |                       | ↑       |
| <i>Sec61g</i>               |                       | ↑       |                          |                       |         |
| <i>Sec63</i>                | ↑                     | ↑       | Disulfide bond formation |                       |         |
| <i>Tram1</i>                |                       | ↑       | <i>Ero1b</i>             | ↑                     | ↑       |
|                             |                       |         | <i>Erp29</i>             | ↑                     | ↑       |
| Signal peptidase            |                       |         | <i>Pdia3</i>             | ↑                     | ↑       |
| <i>Spes2</i>                |                       | ↑       | <i>Pdia4</i>             | ↑                     | ↑       |
| <i>Spes3</i>                |                       | ↑       | <i>Pdia6</i>             | ↑                     | ↑       |
| <i>Sec11l1</i>              | ↑                     | ↑       | <i>Selm</i>              |                       | ↑       |
| <i>Sec11l3</i>              | ↑                     | ↑       | <i>Txndc4</i>            | ↑                     | ↑       |
|                             |                       |         | <i>Txndc5</i>            |                       | ↑       |
|                             |                       |         | <i>Txndc11</i>           | ↑                     | ↑       |

| Vesicular trafficking and transport |                       |         |                                 |                       |         |
|-------------------------------------|-----------------------|---------|---------------------------------|-----------------------|---------|
| Gene symbol                         | ATF6 $\alpha$ (1-373) | XBP1(S) | Gene symbol                     | ATF6 $\alpha$ (1-373) | XBP1(S) |
| Anterograde transport (ER→Golgi)    |                       |         | Retrograde transport (ER←Golgi) |                       |         |
| COPII vesicles                      |                       |         | COPI vesicles                   |                       |         |
| <i>Sec23a</i>                       | ↑                     | ↑       | <i>Arcn1</i>                    |                       | ↑       |
| <i>Sec23b</i>                       | -                     | ↑       | <i>Arfgap3</i>                  | ↑                     | ↑       |
| <i>Sec24d</i>                       | ↑                     | ↑       | <i>Copb1</i>                    |                       | ↑       |
| <i>Sec3111</i>                      | ↑                     | ↑       | <i>Copb2</i>                    |                       | ↑       |
| <i>Yipf5</i>                        |                       | ↑       | <i>Copbe</i>                    |                       | ↑       |
| <i>Yif1a</i>                        | ↑                     | ↑       | <i>Copbg</i>                    | -                     | ↑       |
|                                     |                       |         | <i>Copbz1</i>                   | ↑                     | ↑       |
| Cargo receptors                     |                       |         | Cargo receptors                 |                       |         |
| <i>Lman1</i>                        |                       | ↑       | <i>Kdelr2</i>                   | -                     | ↑       |
| <i>Mfd2</i>                         | ↑                     | ↑       | <i>Kder3</i>                    | ↑                     | ↑       |
| SNAREs                              |                       |         | <i>Lman2</i>                    |                       | ↑       |
| <i>Bet1</i>                         | -                     | ↑       | Transport/recycling in Golgi    |                       |         |
| <i>Bet11</i>                        | ↑                     | ↑       | <i>Blzf1</i>                    | ↑                     | ↑       |
| <i>Sec22b</i>                       |                       | ↑       | <i>Cog3</i>                     | -                     | ↑       |
| Exocytosis                          |                       |         | <i>Cog6</i>                     |                       | ↑       |
| SNAREs                              |                       |         | <i>Gosr2</i>                    | -                     | ↑       |
| <i>Syb11</i>                        |                       | ↑       | <i>Rab33b</i>                   |                       | ↑       |
| <i>Stx5a</i>                        | ↑                     | ↑       | <i>Vdp</i>                      | ↑                     | ↑       |
| <i>Stx18</i>                        |                       | ↑       | Exocytosis                      |                       |         |
| <i>Vamp2</i>                        |                       | ↑       | SNAREs                          |                       |         |
| <i>Vamp4</i>                        | -                     | ↑       | <i>Syb11</i>                    |                       | ↑       |
| Small GTPases                       |                       |         | <i>Stx5a</i>                    | ↑                     | ↑       |
| <i>Rab3a</i>                        | ↑                     | ↑       | <i>Stx18</i>                    | -                     | ↑       |
| <i>Vdp</i>                          | ↑                     | ↑       | <i>Vamp2</i>                    |                       | ↑       |
|                                     |                       |         | <i>Vamp4</i>                    | -                     | ↑       |
|                                     |                       |         | Small GTPases                   |                       |         |
|                                     |                       |         | <i>Rab3a</i>                    | ↑                     | ↑       |

| Others         |                       |         |
|----------------|-----------------------|---------|
| Gene symbol    | ATF6 $\alpha$ (1-373) | XBP1(S) |
| ER proteins    |                       |         |
| <i>Atp2a2</i>  | ↑                     | ↑       |
| <i>Bfar</i>    |                       | ↑       |
| <i>Creb3</i>   | ↑                     | ↑       |
| <i>Creb3l1</i> |                       | ↑       |
| <i>Crebl1</i>  |                       | ↑       |
| <i>Dolpp1</i>  |                       | ↑       |
| <i>Eif2ak3</i> | ↑                     | ↑       |
| <i>Ggcx</i>    | ↑                     | ↑       |
| <i>H13</i>     |                       | ↑       |
| <i>Hmox</i>    | ↑                     | ↑       |
| <i>Leprel</i>  |                       | ↑       |
| <i>Ormdl3</i>  | ↑                     | ↑       |
| <i>Rrbp1</i>   | ↑                     | ↑       |
| <i>Rcn3</i>    | ↑                     | ↑       |
| <i>Piga</i>    | ↑                     | ↑       |
| <i>Sdf2l1</i>  | ↑                     | ↑       |
| <i>Surf4</i>   | ↑                     | ↑       |
| <i>Wfs1</i>    | ↑                     | ↑       |
|                |                       |         |
| Golgi proteins |                       |         |
| <i>Golga3</i>  | ↑                     | ↑       |
| <i>Golga4</i>  |                       | ↑       |
| <i>Golgb1</i>  | ↑                     | ↑       |
| <i>Gcc1</i>    | ↑                     | ↑       |
| <i>Golph3</i>  |                       | ↑       |
| <i>Golph3l</i> |                       | ↑       |
| <i>Gopc</i>    | ↑                     | ↑       |
| <i>Gorasp2</i> |                       | ↑       |
| <i>Rabac1</i>  | ↑                     | ↑       |

| N-Linked glycosylation         |                       |         |
|--------------------------------|-----------------------|---------|
| Gene symbol                    | ATF6 $\alpha$ (1-373) | XBP1(S) |
| Core oligosaccharide synthesis |                       |         |
| <i>Alg2</i>                    |                       | ↑       |
| <i>Alg12</i>                   | ↑                     | ↑       |
| <i>Mgat2</i>                   |                       | ↑       |
|                                |                       |         |
| Oligosaccharyltransferase      |                       |         |
| <i>Ddost</i>                   | ↑                     | ↑       |
| <i>Dad1</i>                    |                       | ↑       |
| <i>Rpn1</i>                    | ↑                     | ↑       |
| <i>Rpn2</i>                    | ↑                     | ↑       |
|                                |                       |         |
| Oligosaccharide processing     |                       |         |
| <i>Gcs1</i>                    |                       | ↑       |

| ER-associated degradation |   |   |
|---------------------------|---|---|
| <i>Der1l</i>              | ↑ | ↑ |
| <i>Edem1</i>              | ↑ | ↑ |
| <i>Herpud1</i>            | ↑ | ↑ |
| <i>Syvn1</i>              | ↑ | ↑ |

Affymetrix microarray analysis revealed that genes encoding proteins that function in the secretory pathway were upregulated in ATF6 $\alpha$ (1-373)- and XBP1(S)-transduced NIH-3T3 fibroblasts ( $\geq 2$ -fold as compared with empty vector controls;  $P < 0.05$ ). These genes are grouped according to function and/or location.  
blank, no change; ↑, upregulated 2-fold or higher.
