# Supplementary material
Source: PubMed Central journal article supplement (PMC2680102)

**ATF6 $\alpha$  (1-373)**

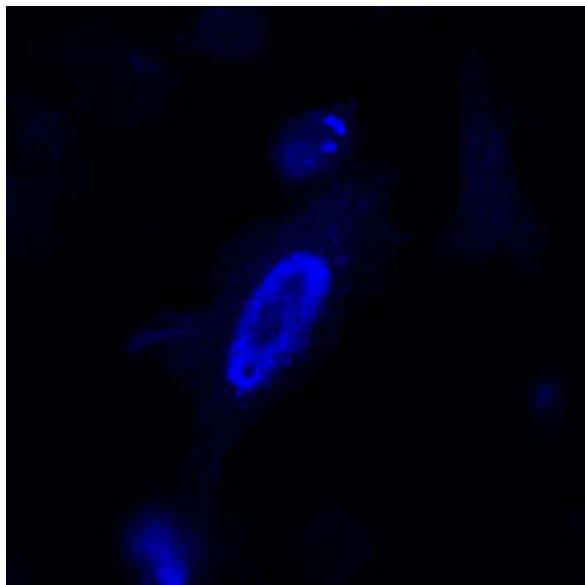

**DsRed-ER**

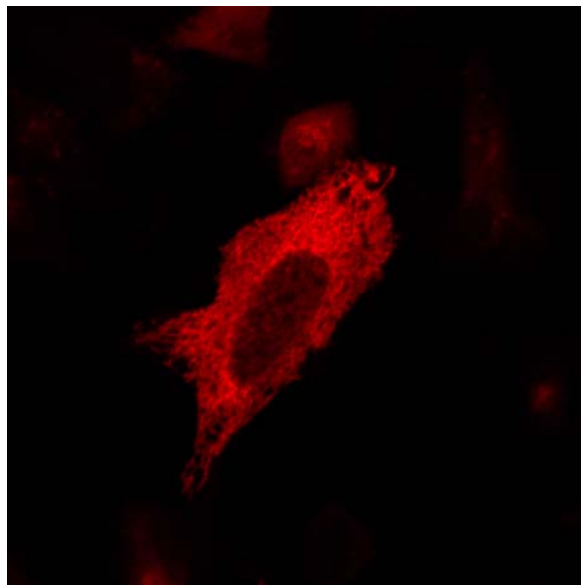

**Merged**

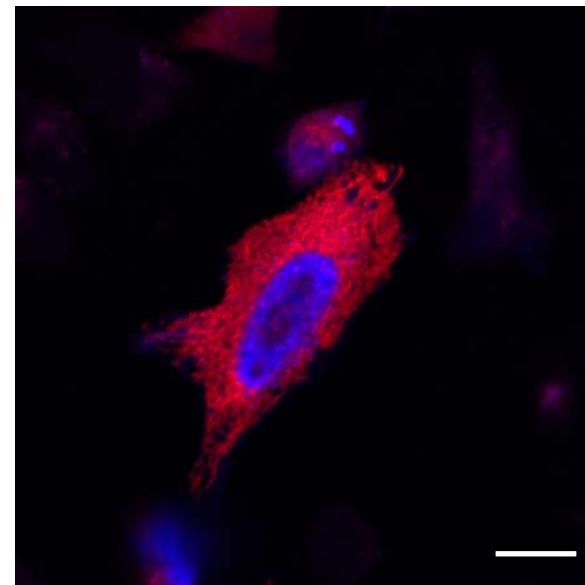

**ATF6 $\alpha$  (1-373)m1**

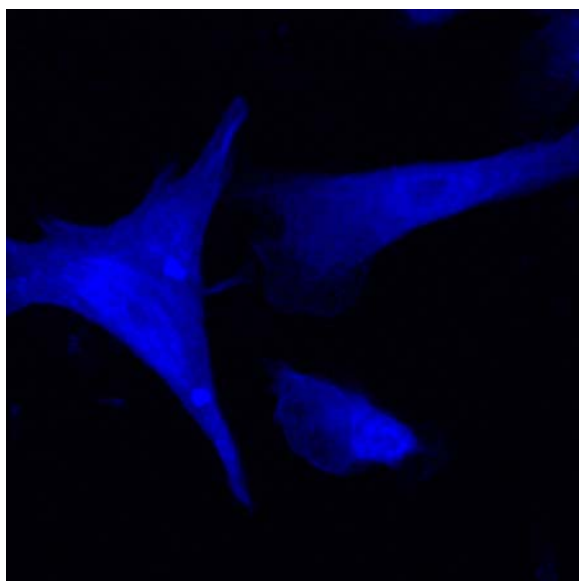

**DsRed-ER**

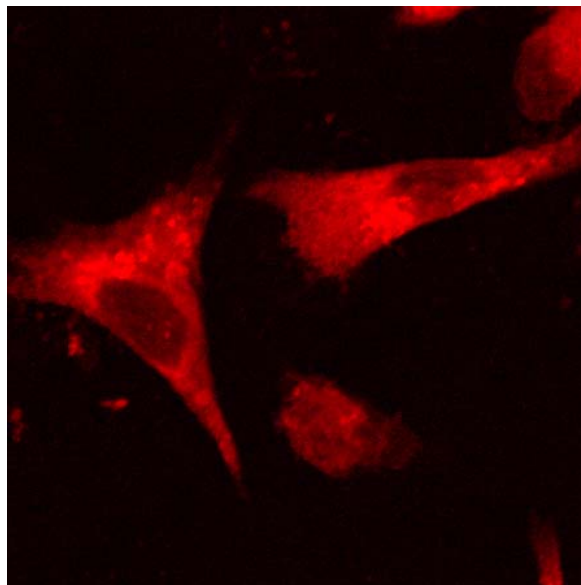

**Merged**

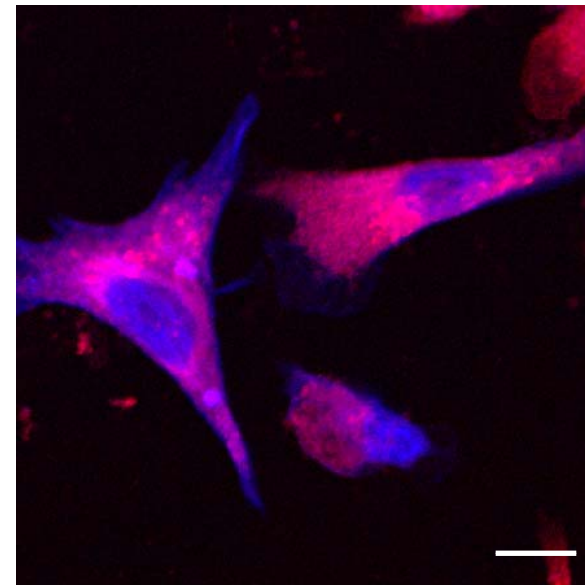

Supplement: supp_122_10_1626__1.pdf [file supp_122_10_1626__1.pdf]

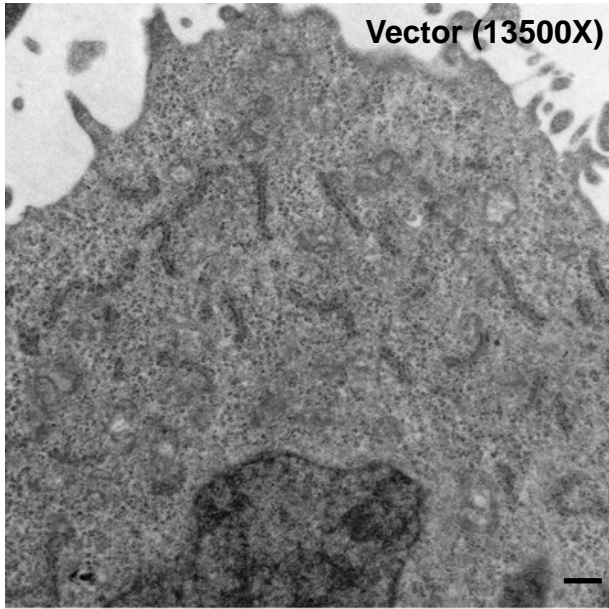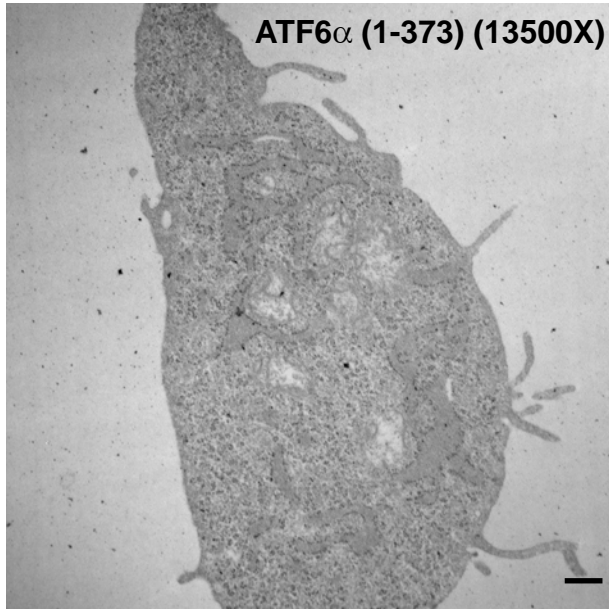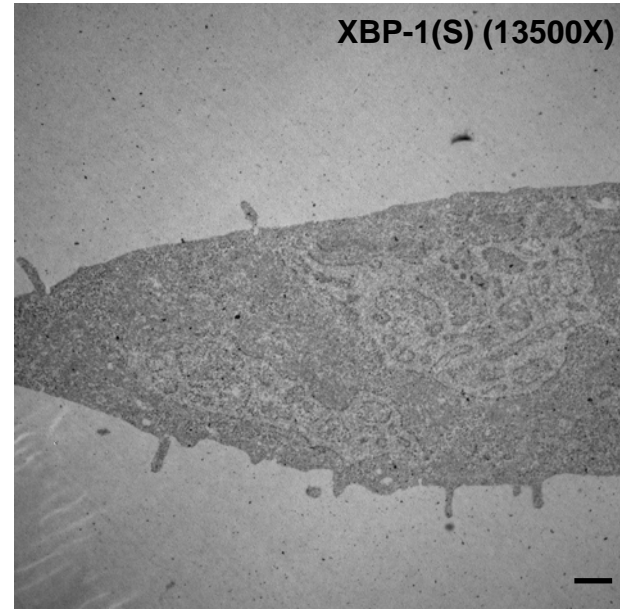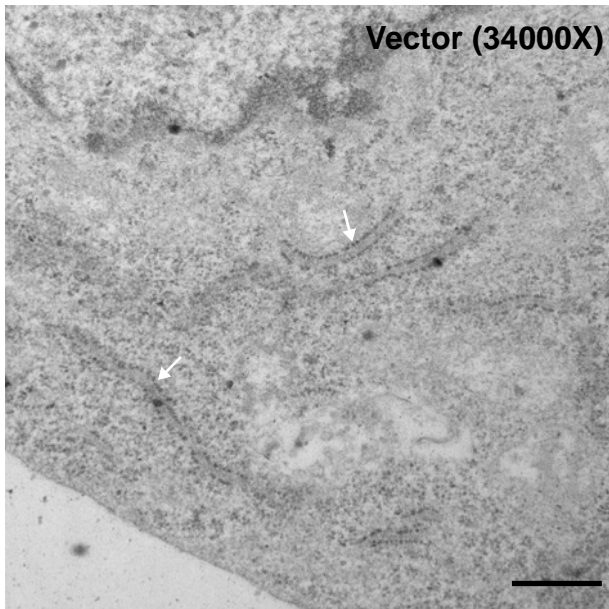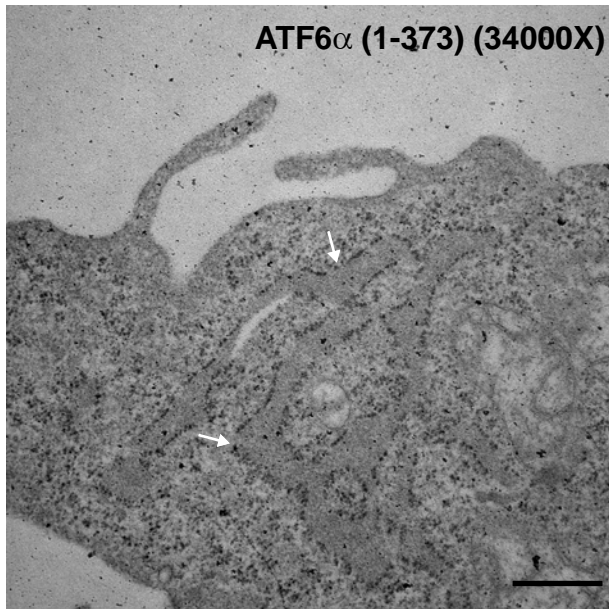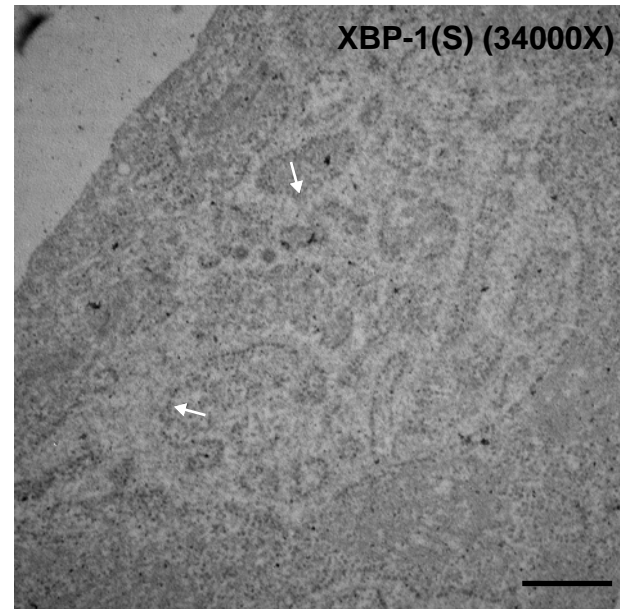

Supplement: supp_122_10_1626__2.pdf [file supp_122_10_1626__2.pdf]

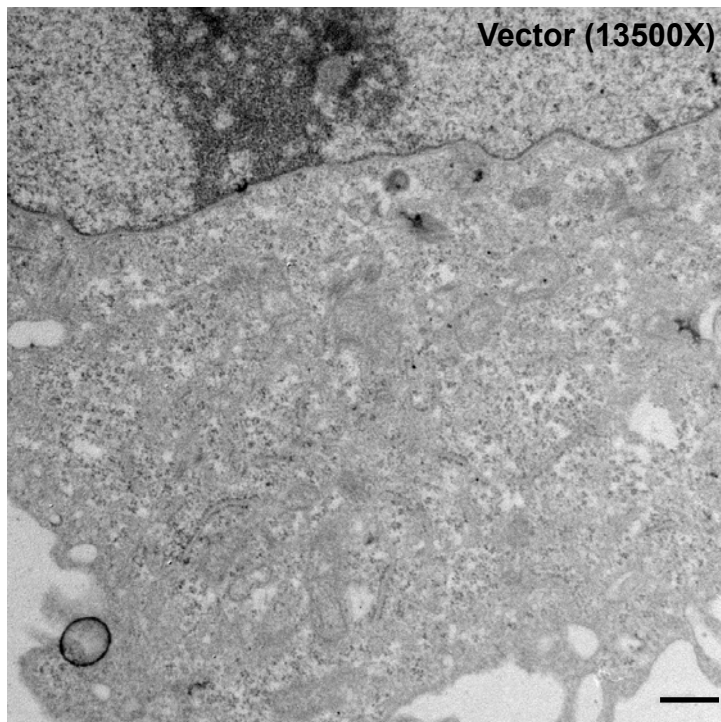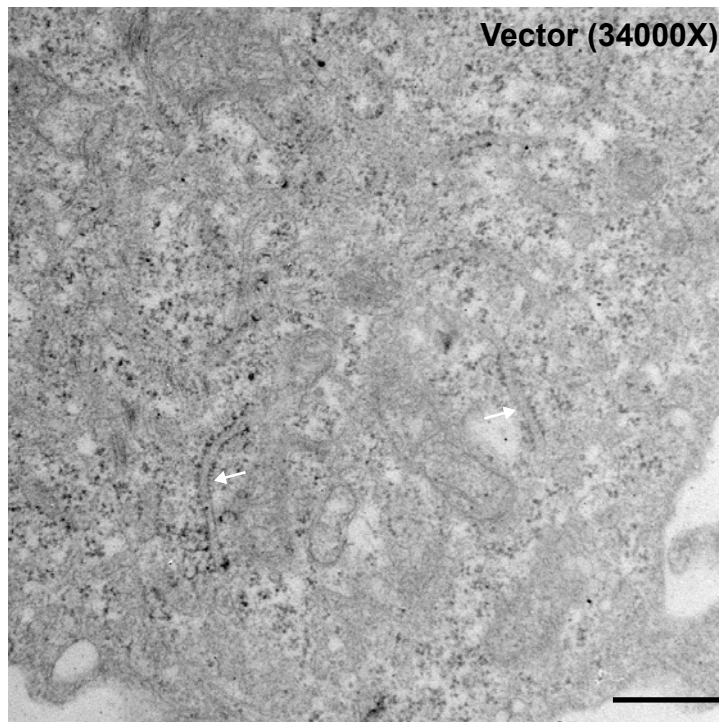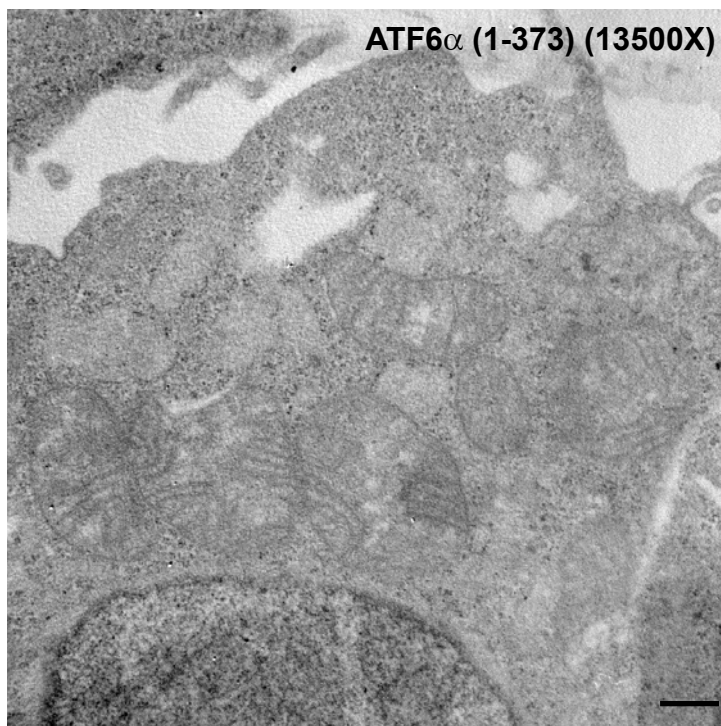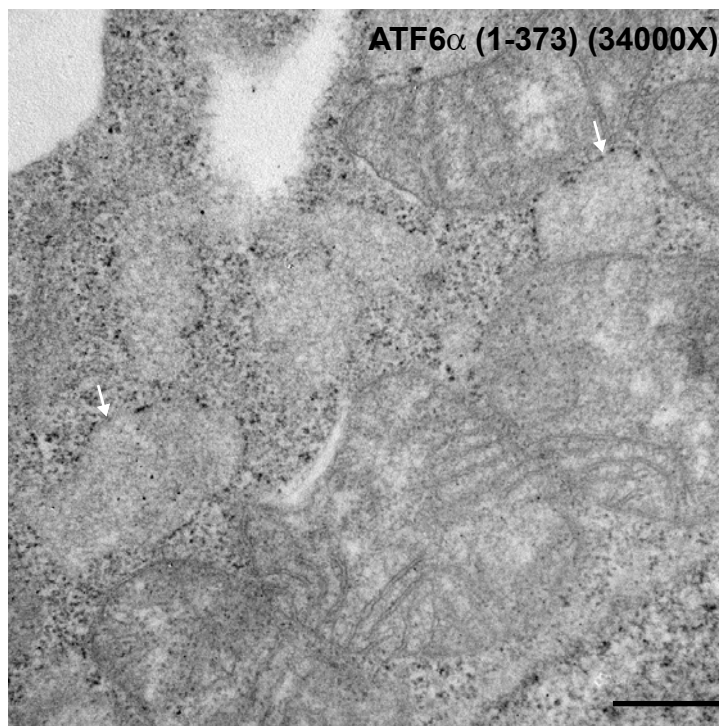

Supplement: supp_122_10_1626__3.pdf [file supp_122_10_1626__3.pdf]

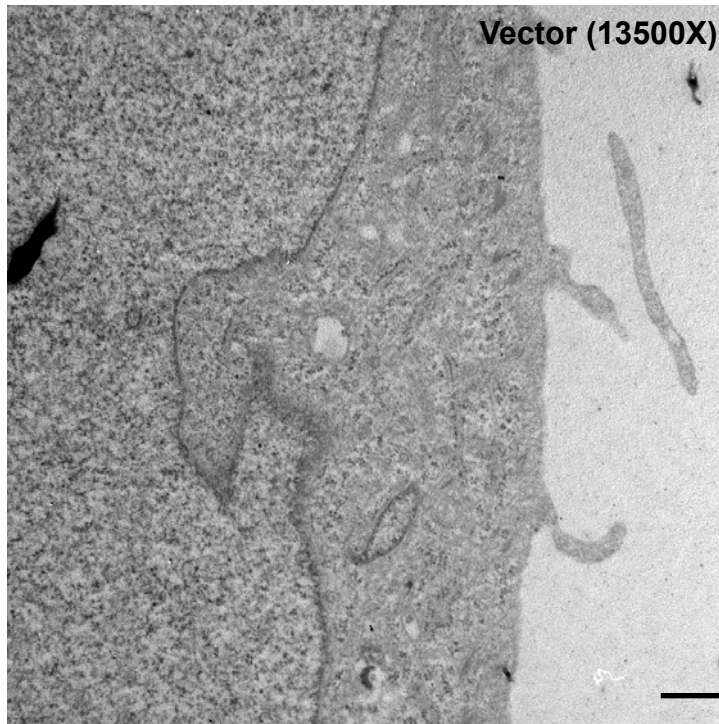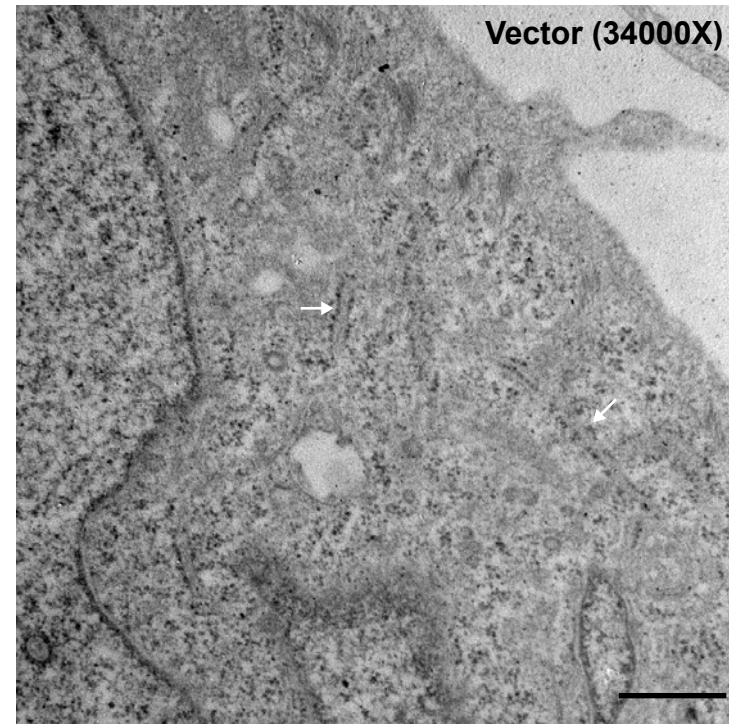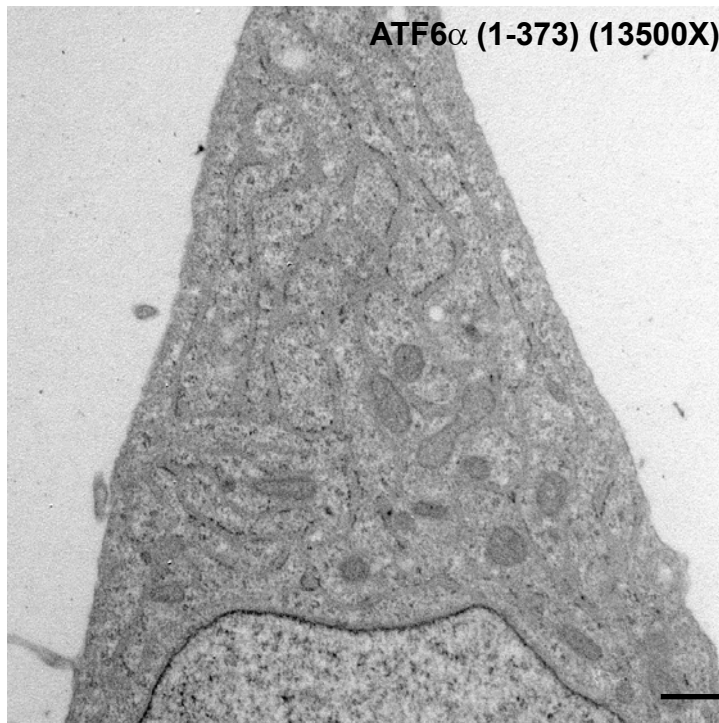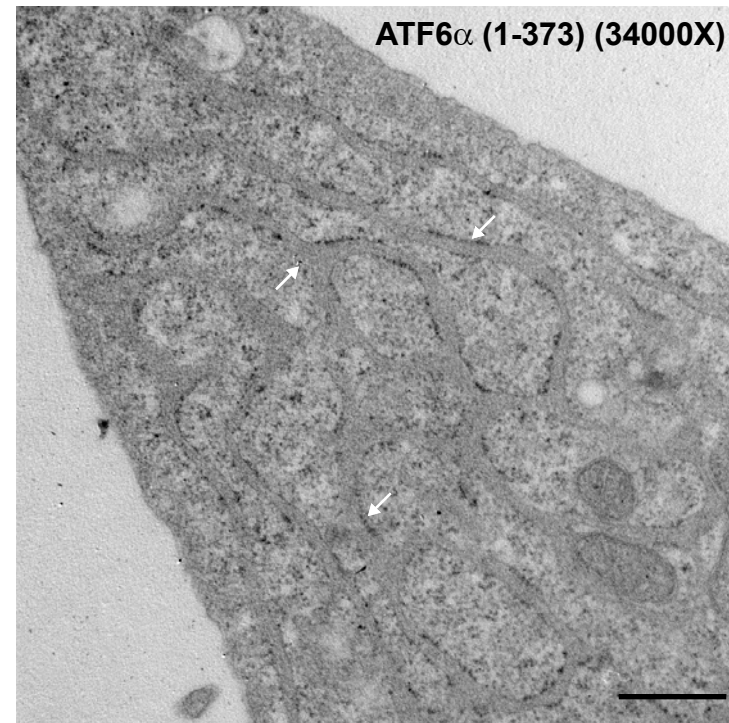

Supplement: supp_122_10_1626__4.pdf [file supp_122_10_1626__4.pdf]

**A**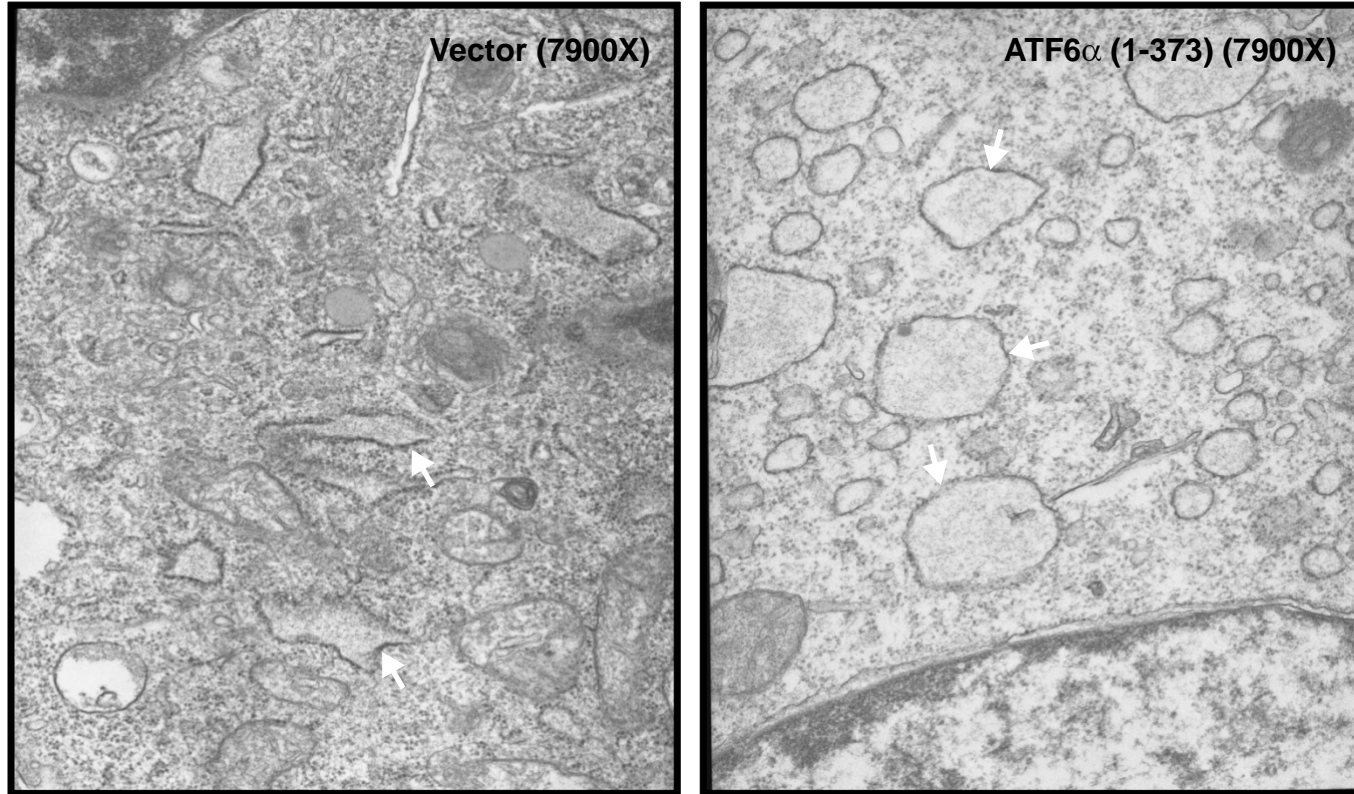**B**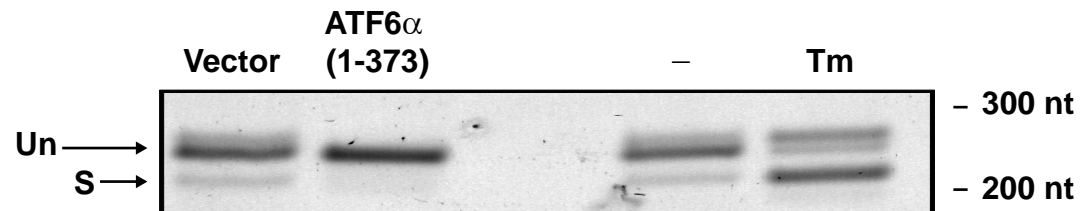

Supplement: supp_122_10_1626__6.pdf [file supp_122_10_1626__6.pdf]
